# Supplementary material
Source: Elsevier journal article supplement (https://www.sciencedirect.com/science/article/pii/S0213911119300391)
Supplement: mmc1 [file S0213911119300391:mmc1.docx]

**Appendix**

**Table I**

DVQ-R questionnaire (*Perceived disturbance* scale*)

| Now we ask you how much each of the following behaviors **DISTURBED*** you and, if it has not happened to you, how much do you think it would have bothered you.  Please, mark with an “X” one of the 5 boxes for each of the following statements. | Not at all | Not much | Somewhat | Quite a bit | Very much |
| --- | --- | --- | --- | --- | --- |
| 1. ‘‘Tests’’ your love, setting traps to ﬁnd out if you are cheating |  |  |  |  |  |
| 1. You feel compelled to have sex as long as you don’t have to explain why |  |  |  |  |  |
| 1. Has beaten you |  |  |  |  |  |
| 1. Is a good student, but is always late at meetings, does not fulﬁl his/her promises, and is irresponsible |  |  |  |  |  |
| 1. Talks to you about relationships he/she imagines you have |  |  |  |  |  |
| 1. Insists on touching you in ways and places which you don’t like and don’t want |  |  |  |  |  |
| 1. Has slapped your face, pushed or shaken you |  |  |  |  |  |
| 1. Does not acknowledge any responsibility regarding the relationship or what happens to both of you |  |  |  |  |  |
| 1. Criticizes you, underestimates the way you are, or humiliates your self-esteem |  |  |  |  |  |
| 1. Has thrown blunt instruments at you |  |  |  |  |  |
| 1. Has hurt you with an object |  |  |  |  |  |
| 1. Ridicules your way of expressing yourself |  |  |  |  |  |
| 1. Has physically kept you from leaving |  |  |  |  |  |
| 1. You feel forced to perform certain sexual acts |  |  |  |  |  |
| 1. Has ignored your feelings |  |  |  |  |  |
| 1. Stops talking to you or disappears for several days, without any explanation, to show their annoyance |  |  |  |  |  |
| 1. Invades your space (listening to a loud music when you are studying, listening your phone calls. . .) |  |  |  |  |  |
| 1. Forces you to undress even if you don’t want to |  |  |  |  |  |
| 1. Has ridiculed or insulted your beliefs, religion or social class |  |  |  |  |  |
| 1. Ridicules or insults you for the ideas you uphold |  |  |  |  |  |

Detachment (items 4,8,15,16), humiliation (items 9,12,19,20), coercion (items 1,5,13,17), physical abuse (items 3,7,10,11) and sexual abuse (items 2,6,14,18),

*Participants are deemed to be tolerant towards violent behavior when they say this behavior annoy them "not at all", "not much" or "somewhat".

**Table II**

GRAS questionnaire.

| Please, mark with an “X” where appropriate | Strongly disagree | Disagree | Partially disagree | Agree | Strongly agree |
| --- | --- | --- | --- | --- | --- |
| 1. People can be aggressive and understanding, regardless of their sex |  |  |  |  |  |
| 1. People should be treated equally, regardless of their sex |  |  |  |  |  |
| 1. Children should be given freedom depending on their age and how mature they are, not depending on their sex |  |  |  |  |  |
| 1. Boys have the same obligations to help with household chores as girls |  |  |  |  |  |
| 1. Household chores should not be allocated by sex |  |  |  |  |  |
| 1. We should stop thinking about whether people are men or women and focus on other characteristics |  |  |  |  |  |
| 1. My partner thinking that I am responsible for doing the household chores would cause me stress |  |  |  |  |  |
| 1. The husband is responsible for the family so the wife must obey him |  |  |  |  |  |
| 1. A woman must not contradict her partner |  |  |  |  |  |
| 1. I think it is worse to see a man cry than a woman |  |  |  |  |  |
| 1. Girls should be more clean and tidy than boys |  |  |  |  |  |
| 1. Men should occupy posts of responsibility |  |  |  |  |  |
| 1. I think boys should be brought up differently than girls |  |  |  |  |  |
| 1. I think it is right that in my circles of friends, my future domestic activity is considered more important than my professional activity |  |  |  |  |  |
| 1. A father’s main responsibility is to help his children financially |  |  |  |  |  |
| 1. Some jobs are not appropriate for women |  |  |  |  |  |
| 1. I accept that in my circle of friends, my partner’s future job is considered more important than mine |  |  |  |  |  |
| 1. Mothers should make most of the decisions on how to bring up their children |  |  |  |  |  |
| 1. Only some kinds of job are equally appropriate for men and women |  |  |  |  |  |
| 1. EFS In many important jobs it is better to contract men than women |  |  |  |  |  |

Family function (items 4,5,7,8,13,18); social function (items 1,2,3,6,9,10,11,14); occupational function (items 12,15,16,17,19,20).

**Table III**

Estimated mean score for IPV-tolerance and sexist attitudes according to sex, degree and academic course.

|  | **Men (n = 262)** | | | | | **Women (n = 1060)** | | | | |
| --- | --- | --- | --- | --- | --- | --- | --- | --- | --- | --- |
|  | **1st course**  **(n = 78)** | **2nd course**  **(n = 58)** | **3rd course**  **(n = 74)** | **4th course**  **(n = 52)** | **p-trend**b | **1st course**  **(n = 350)** | **2nd course**  **(n = 241)** | **3rd course**  **(n = 274)** | **4th course**  **(n = 195)** | **p-trend**b |
| **IPV-tolerant, total** |  |  |  |  |  |  |  |  |  |  |
| *Medicine, n* | 39 | 34 | 50 | 37 |  | 94 | 93 | 109 | 78 |  |
| Crude mean | 6.64 | 9.26 | 5.30 | 4.78 | 0.042 | 3.65 | 3.32 | 2.73 | 1.13 | 0.003 |
| Adjusted meana | 6.59 | 9.36 | 5.41 | 4.93 | 0.053 | 3.65 | 3.32 | 2.72 | 1.15 | 0.003 |
| *Nursing, n* | 29 | 15 | 19 | 2 |  | 164 | 92 | 114 | 62 |  |
| Crude mean | 8.38 | 6.60 | 6.11 | 7.00 | 0.298 | 3.50 | 1.77 | 2.48 | 3.98 | 0.913 |
| Adjusted meana | 8.49 | 6.39 | 6.24 | 5.72 | 0.248 | 3.48 | 1.76 | 2.49 | 4.05 | 0.970 |
| *Psychology, n* | 10 | 9 | 5 | 13 |  | 92 | 56 | 51 | 55 |  |
| Crude mean | 10.7 | 7.44 | 5.20 | 8.46 | 0.407 | 3.25 | 1.84 | 2.67 | 2.78 | 0.507 |
| Adjusted meana | 10.7 | 7.12 | 5.56 | 8.54 | 0.473 | 3.30 | 1.67 | 2.54 | 2.99 | 0.590 |
| **Sexist attitudes, total** |  |  |  |  |  |  |  |  |  |  |
| *Medicine* | 39 | 34 | 50 | 37 |  | 94 | 93 | 109 | 78 |  |
| Crude mean | 13.5 | 14.5 | 11.2 | 9.08 | 0.032 | 4.97 | 5.41 | 4.72 | 4.96 | 0.767 |
| Adjusted meana | 13.8 | 14.4 | 11.1 | 8.71 | 0.013 | 4.99 | 5.37 | 4.72 | 4.97 | 0758 |
| *Nursing* | 29 | 15 | 19 | 2 |  | 164 | 92 | 114 | 62 |  |
| Crude mean | 13.7 | 10.5 | 8.63 | 14.5 | 0.057 | 6.14 | 5.38 | 4.72 | 5.37 | 0.182 |
| Adjusted meana | 13.9 | 10.5 | 8.5 | 14.0 | 0.052 | 6.11 | 5.52 | 4.61 | 5.44 | 0.183 |
| *Psychology* | 10 | 9 | 5 | 13 |  | 92 | 56 | 51 | 55 |  |
| Crude mean | 17.8 | 18.0 | 20.2 | 18.4 | 0.807 | 9.73 | 8.67 | 8.35 | 8.14 | 0.093 |
| Adjusted meana | 17.5 | 17.9 | 20.6 | 18.5 | 0.701 | 9.32 | 8.68 | 8.17 | 8.16 | 0.067 |

IPV: intimate partner violence; SD: standard deviation.

aModel adjusted for age and perception of abuse (perceived abuse, unperceived abuse, non-abuse).

bp value from the regression models in which academic course was included as a continuous variable.

**Table IV**

Estimatedproportion of students tolerant to IPV and with sexist attitudes according to sex and academic course.

|  | **Men (n = 262)** | | | | | **Women (n = 1060)** | | | | |
| --- | --- | --- | --- | --- | --- | --- | --- | --- | --- | --- |
|  | **1st course**  **(n = 78)** | **2nd course**  **(n = 58)** | **3rd course**  **(n = 74)** | **4th course**  **(n = 52)** | **p-trend**b | **1st course**  **(n = 350)** | **2nd course**  **(n = 241)** | **3rd course**  **(n = 274)** | **4th course**  **(n = 195)** | **p-trend**b |
| **IPV-tolerant** |  |  |  |  |  |  |  |  |  |  |
| *Detachment* |  |  |  |  |  |  |  |  |  |  |
| % crude | 64.1 | 67.2 | 61.5 | 64.2 | 0.717 | 44.9 | 32.4 | 33.2 | 31.8 | 0.001 |
| % adjusteda | 62.7 | 67.5 | 64.3 | 62.1 | 0.901 | 46.4 | 32.5 | 32.1 | 30.7 | <0.001 |
| *Humiliation* |  |  |  |  |  |  |  |  |  |  |
| % crude | 48.7 | 48.3 | 32.4 | 42.3 | 0.152 | 24.3 | 16.2 | 17.9 | 21.5 | 0.282 |
| % adjusteda | 49.0 | 48.5 | 32.0 | 41.6 | 0.151 | 25.8 | 16.4 | 16.9 | 20.5 | 0.079 |
| *Coercion* |  |  |  |  |  |  |  |  |  |  |
| % crude | 80.8 | 77.6 | 70.3 | 71.2 | 0.117 | 50.6 | 40.3 | 36.1 | 37.4 | 0.001 |
| % adjusteda | 81.0 | 77.9 | 70.1 | 70.4 | 0.115 | 51.3 | 40.4 | 35.4 | 39.9 | <0.001 |
| *Physical* |  |  |  |  |  |  |  |  |  |  |
| % crude | 41.0 | 39.9 | 27.0 | 26.9 | 0.039 | 13.1 | 8.7 | 10.6 | 8.7 | 0.141 |
| % adjusteda | 41.1 | 37.9 | 27.0 | 26.8 | 0.053 | 14.9 | 9.1 | 9.6 | 7.8 | 0.012 |
| *Sexual* |  |  |  |  |  |  |  |  |  |  |
| % crude | 65.4 | 74.1 | 50.0 | 44.2 | 0.003 | 20.9 | 16.6 | 16.1 | 13.8 | 0.032 |
| % adjusteda | 67.0 | 74.1 | 49.1 | 42.9 | 0.002 | 22.7 | 17.0 | 14.9 | 12.9 | 0.003 |
| *Total* |  |  |  |  |  |  |  |  |  |  |
| % crude | 91.0 | 89.7 | 81.1 | 88.5 | 0.284 | 67.1 | 53.1 | 50.0 | 51.7 | <0.001 |
| % adjusteda | 90.2 | 89.9 | 81.2 | 88.7 | 0.456 | 67.5 | 53.3 | 49.1 | 51.9 | <0.001 |
| **Sexist attitudes** |  |  |  |  |  |  |  |  |  |  |
| *Family* |  |  |  |  |  |  |  |  |  |  |
| % crude | 48.7 | 53.5 | 32.4 | 46.2 | 0.233 | 22.9 | 20.7 | 20.4 | 23.1 | 0.871 |
| % adjusteda | 48.5 | 53.6 | 32.5 | 46.2 | 0.293 | 23.6 | 21.0 | 19.8 | 22.4 | 0.545 |
| *Social* |  |  |  |  |  |  |  |  |  |  |
| % crude | 74.4 | 65.5 | 54.1 | 61.5 | 0.032 | 38.6 | 37.4 | 32.8 | 36.4 | 0.320 |
| % adjusteda | 73.9 | 65.6 | 54.3 | 62.0 | 0.074 | 38.1 | 37.1 | 33.0 | 37.1 | 0.519 |
| *Occupational* |  |  |  |  |  |  |  |  |  |  |
| % crude | 87..2 | 77.6 | 64.9 | 75.0 | 0.017 | 46.3 | 42.7 | 35.0 | 39.5 | 0.019 |
| % adjusteda | 89.5 | 76.9 | 62.2 | 71.7 | 0.005 | 46.2 | 42.9 | 34.7 | 39.8 | 0.034 |
| *Total* |  |  |  |  |  |  |  |  |  |  |
| % crude | 96.2 | 87.3 | 78.4 | 78.9 | 0.001 | 64.6 | 62.2 | 57.3 | 62.1 | 0.239 |
| % adjusteda | 96.6 | 87.7 | 77.2 | 77.3 | 0.001 | 64.8 | 62.3 | 56.9 | 62.0 | 0.235 |

IPV: intimate partner violence.

aModel adjusted for age and perception of abuse (perceived abuse, unperceived abuse, non-abuse).

bp value from the regression models in which academic course was included as a continuou
